# Supplementary material
Source: MDPI journal article supplement (https://www.mdpi.com/2072-4292/15/23/5440)

**Table S1.** The table gathers the outputs and results obtained from each methodology step carried out for each domain of the two DsGSDs. The table collects the PS coverage expressed in percentage computed on all the available Sentinel 1 datasets, the mean data of aspect and slope, the Data Suitability Ranking cases and the mean, medium and the standard deviation of the ground deformation maps obtained.

| Valtounenche DsGSD  | Domains | PS coverage (%)   |                   |                   |                    | mean aspect (°) | mean slope (°) | DSR case | Results (mm/yr)   |      |        |                   |       |        |                |       |        |                 |       |        |                    |       |        |
|---------------------|---------|-------------------|-------------------|-------------------|--------------------|-----------------|----------------|----------|-------------------|------|--------|-------------------|-------|--------|----------------|-------|--------|-----------------|-------|--------|--------------------|-------|--------|
|                     |         | V <sub>LOSa</sub> | V <sub>LOSd</sub> | V <sub>ew-v</sub> | V <sub>slope</sub> |                 |                |          | V <sub>LOSa</sub> |      |        | V <sub>LOSd</sub> |       |        | V <sub>v</sub> |       |        | V <sub>ew</sub> |       |        | V <sub>slope</sub> |       |        |
|                     |         |                   |                   |                   |                    |                 |                |          | mean              | med. | st.dv. | mean              | med.  | st.dv. | mean           | med.  | st.dv. | mean            | med.  | st.dv. | mean               | med.  | st.dv. |
|                     | A       | 13.8              | 40.8              | 19.0              | 42.3               | 275.9           | 29.6           | case 1d  | -                 | -    | -      | -5.19             | -2.85 | 5.86   | N.C            | N.C   | N.C    | N.C             | N.C   | N.C    | -7.36              | -3.21 | 11.21  |
| B                   | 3.6     | 12.9              | 4.4               | 13.7              | 292.5              | 16.6            | N.C.           | -        | -                 | -    | N.C    | N.C               | N.C   | N.C    | N.C            | N.C   | N.C    | N.C             | N.C   | N.C    | N.C                | N.C   |        |
| C                   | 37.7    | 51                | 53.4              | 52.2              | 257.1              | 19.7            | case 1d        | -        | -                 | -    | -8.03  | -7.81             | 1.52  | -2.42  | -2.54          | 0.80  | -11.4  | -10.9           | 2.36  | -12.9  | -12.8              | 2.86  |        |
| D                   | 43.1    | 51                | 55.3              | 54.9              | 266.5              | 15.9            | case 1d        | -        | -                 | -    | -3.55  | -3.45             | 1.38  | -0.87  | -0.77          | 0.68  | -5.29  | -5.28           | 2.01  | -6.17  | -6.07              | 2.55  |        |
| Croix de Fana DsGSD | Domains | PS coverage (%)   |                   |                   |                    | mean aspect (°) | mean slope (°) | DSR case | Results (mm/yr)   |      |        |                   |       |        |                |       |        |                 |       |        |                    |       |        |
|                     |         | V <sub>LOSa</sub> | V <sub>LOSd</sub> | V <sub>ew-v</sub> | V <sub>slope</sub> |                 |                |          | V <sub>LOSa</sub> |      |        | V <sub>LOSd</sub> |       |        | V <sub>v</sub> |       |        | V <sub>ew</sub> |       |        | V <sub>slope</sub> |       |        |
|                     |         |                   |                   |                   |                    |                 |                |          | mean              | med. | st.dv. | mean              | med.  | st.dv. | mean           | med.  | st.dv. | mean            | med.  | st.dv. | mean               | med.  | st.dv. |
|                     | A       | 55.2              | 53.5              | 51.0              | 54.7               | 178.4           | 22.6           | case 3   | -                 | -    | -      | -                 | -     | -      | -4.44          | -4.69 | 1.55   | -0.24           | -0.22 | 1.66   | -11.7              | -12.0 | 4.44   |
|                     | B       | 50.1              | 45.1              | 40.5              | 42.9               | 167.6           | 20.3           | case 3   | -                 | -    | -      | -                 | -     | -      | -3.22          | -3.15 | 0.72   | -0.08           | -0.28 | 1.57   | -8.16              | -8.14 | 2.40   |
|                     | C       | 49.5              | 47.8              | 46.7              | 41.8               | 190.1           | 23.7           | case 3   | -                 | -    | -      | -                 | -     | -      | -0.91          | -0.71 | 1.05   | -1.51           | -1.51 | 0.63   | -4.11              | -3.73 | 1.99   |
|                     | D       | 82.7              | 84.7              | 81.9              | 88.6               | 189.1           | 31.8           | case 3   | -                 | -    | -      | -                 | -     | -      | -3.10          | -3.02 | 0.36   | -1.36           | -1.35 | 0.24   | -7.53              | -7.58 | 0.75   |
| E                   | 95.7    | 76.9              | 76.9              | 76.9              | 192.3              | 30.3            | case 3         | -        | -                 | -    | -      | -                 | -     | -3.48  | -3.55          | 0.33  | -1.61  | -1.56           | 0.27  | -9.10  | -9.35              | 0.91  |        |
| F                   | 46.2    | 38                | 37.1              | 44.2              | 145.6              | 24.3            | case 3         | -        | -                 | -    | -      | -                 | -     | -1.16  | -1.02          | 0.86  | 0.90   | 0.20            | 1.76  | -3.49  | -3.16              | 2.13  |        |

**Table S2.** Comparison of interpolation results of VLOSd, Vv, Vew and Vslope datasets of Valtouranche domain A considering and excluding landslide L1.

|                                       | VLOSd |        |       | V <sub>v</sub> |        |       | V <sub>ew</sub> |        |       | V <sub>slope</sub> |        |       |
|---------------------------------------|-------|--------|-------|----------------|--------|-------|-----------------|--------|-------|--------------------|--------|-------|
|                                       | mean  | median | stdev | mean           | median | stdev | mean            | median | stdev | mean               | median | stdev |
|                                       | -3.08 | -2.09  | 3.06  | -1.45          | -0.94  | 1.45  | -1.36           | -0.41  | 1.96  | -3.63              | -2.35  | 4.18  |
| Domain A<br><u>considering</u> the L1 |       |        |       |                |        |       |                 |        |       |                    |        |       |
| Domain A<br><u>excluding</u> the L1   | -5.19 | -2.85  | 5.86  | -5.56          | -2.06  | 7.87  | -3.29           | -1.62  | 3.55  | -7.36              | -3.21  | 11.21 |

**Figure S1.** Computing of PS density related to the  $V_v$  and  $V_{ew}$  dataset on the Valtorunenche DsGSD. a) Map of PSs density that shows the valid cells (PSs density  $\geq$  PSs/Km<sup>2</sup>) and the discarded cells (PSs density  $<$  PSs/Km<sup>2</sup>). b) Map that shows the  $C_{ps}$  for each domains of the DsGSD of Valtournenche.

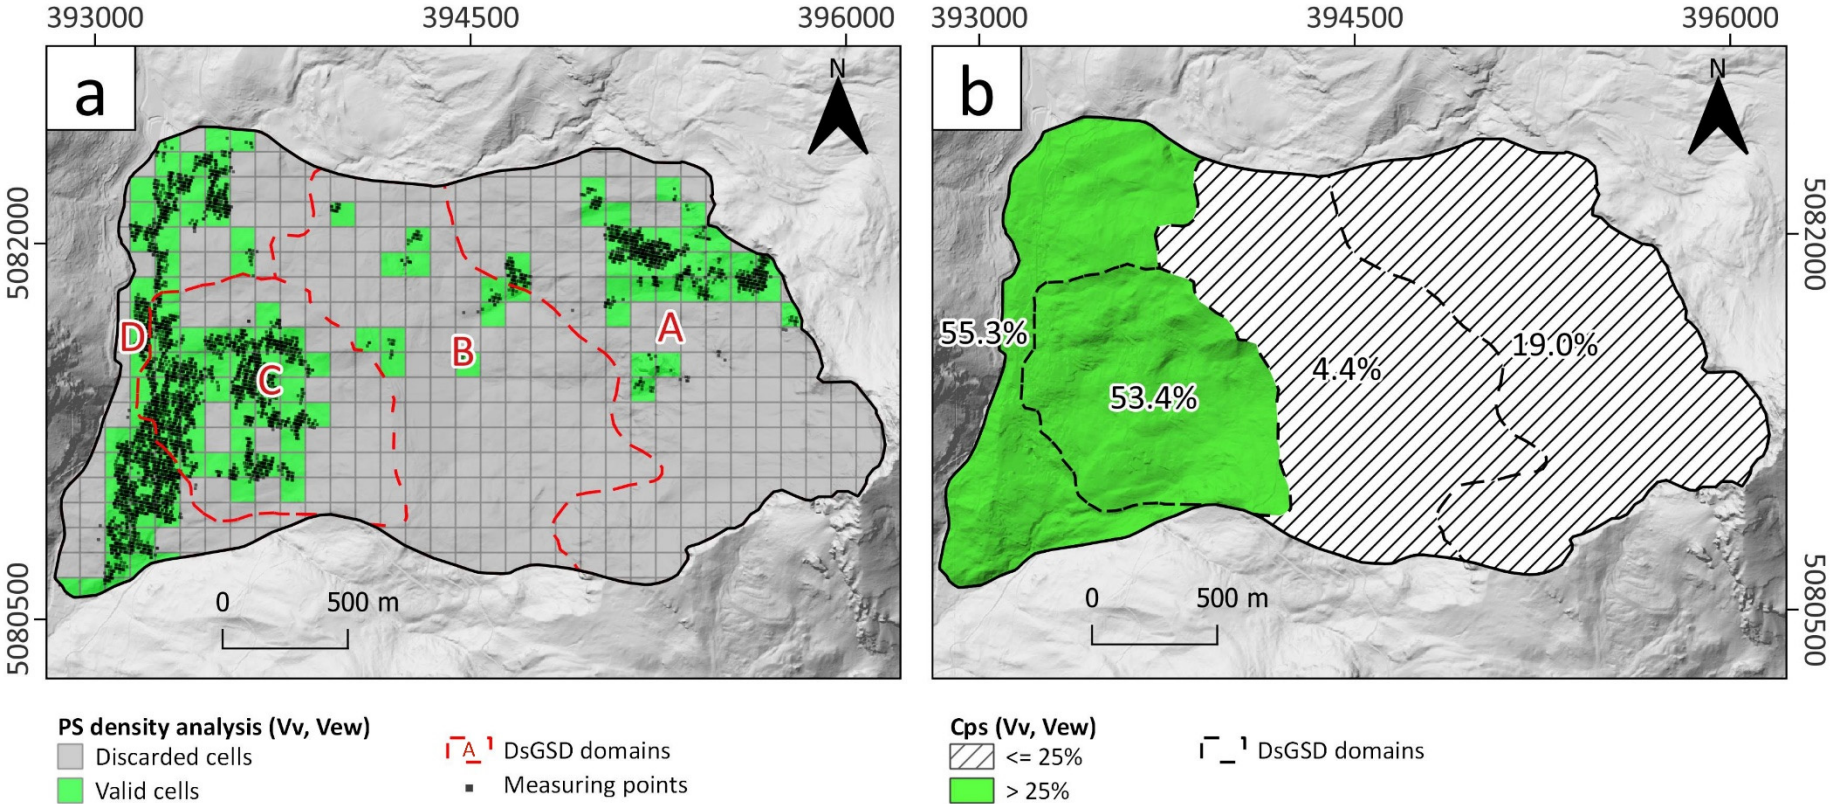

**Figure S2.** DSR matrix associated to the most suitable velocity component, depending on each couple of slope/aspect and the position occupied by both the DsGSD of interest.

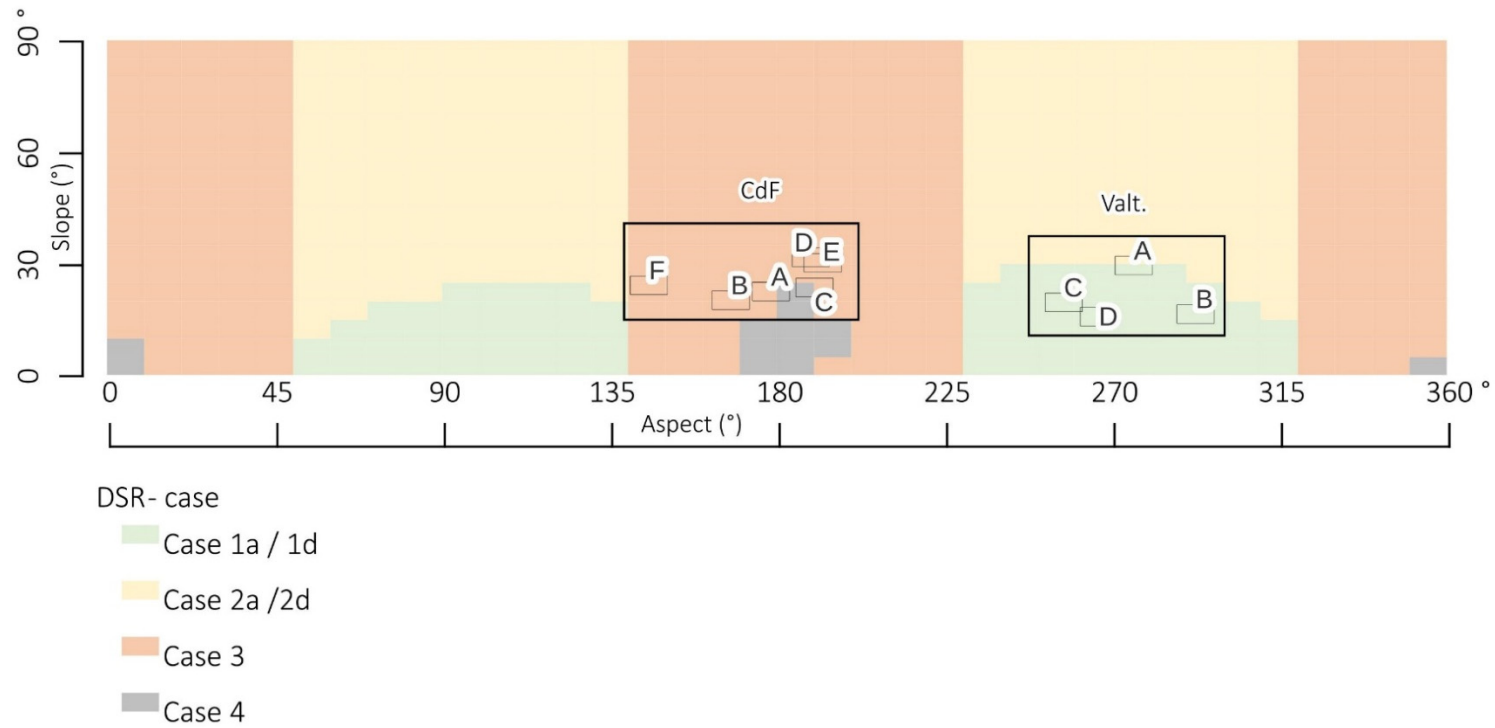

Supplement: s1 [file s1]
